# Supplementary material for: Rapid Precision Functional Mapping of Individuals Using Multi-Echo fMRI
Source: PubMed Central journal article supplement — Cell Rep. Author manuscript; Available in PMC 2021 Jan 8. (PMC7792478; doi:10.1016/j.celrep.2020.108540), 2020-12-22
Supplement: NIHMS1657605-supplement-1.pdf [file NIHMS1657605-supplement-1.pdf]

**Cell Reports, Volume 33**

**Supplemental Information**

**Rapid Precision Functional Mapping  
of Individuals Using Multi-Echo fMRI**

**Charles J. Lynch, Jonathan D. Power, Matthew A. Scult, Marc Dubin, Faith M. Gunning, and Conor Liston**

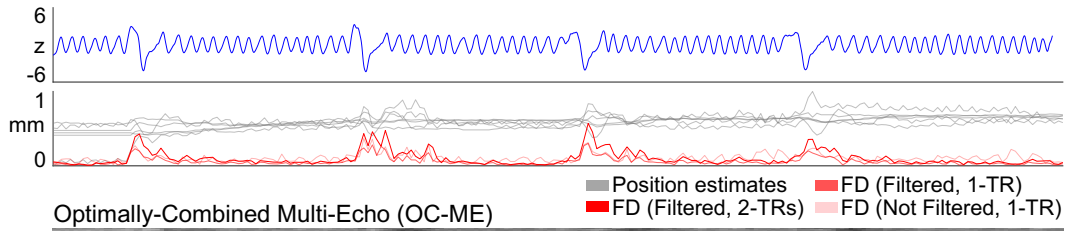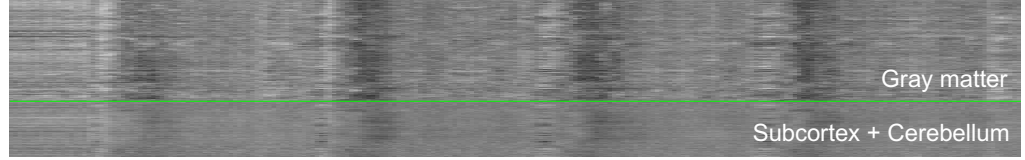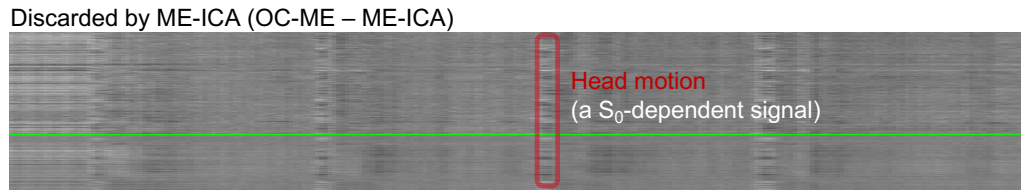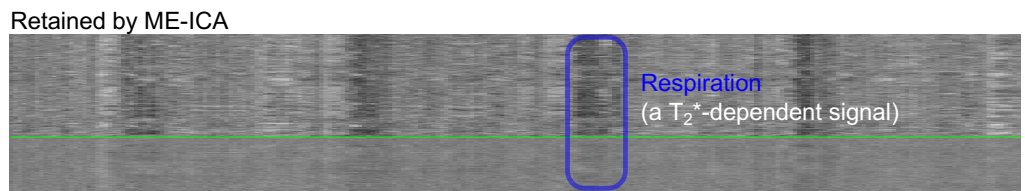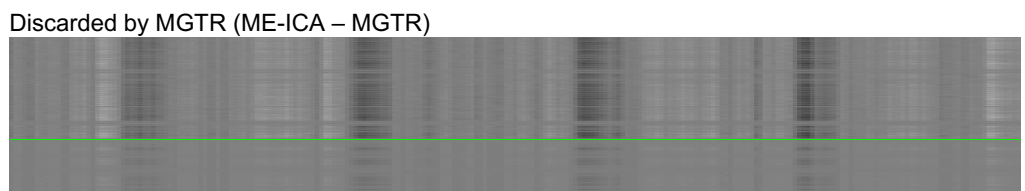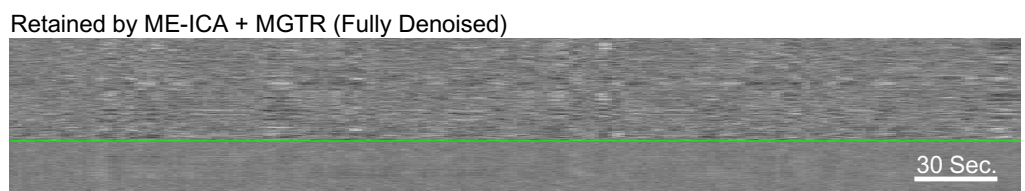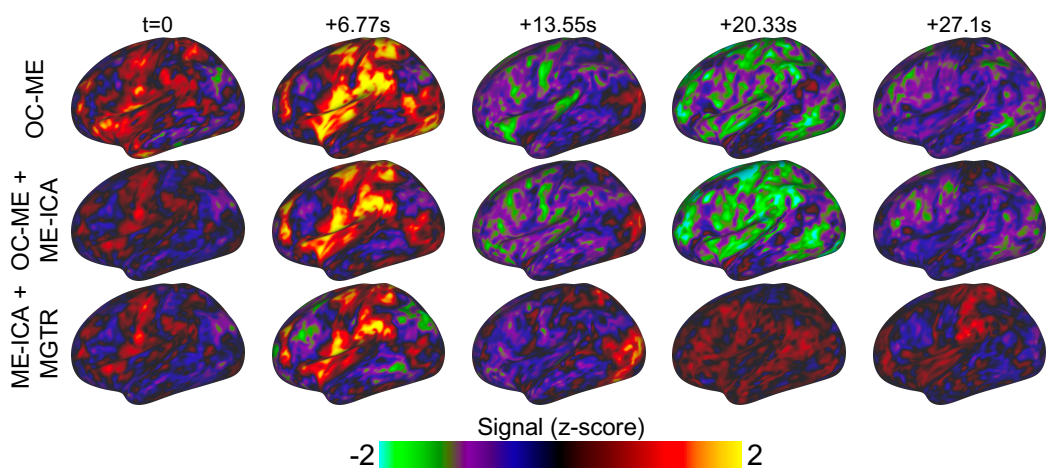



2 **Figure S1.** Related to Figure 3. An event-related approach for establishing appropriate separation  
3 of neurobiological ( $T_2^*$ -dependent; “BOLD-like”) and non-neurobiological ( $S_0$ -dependent; not  
4 “BOLD-like”) fMRI signals. During each instructed deep breathing scan, sub-ME01 was prompted  
5 every 70 seconds (via a visual cue) to take a deep breath. There are prominent  $T_2^*$ - and  $S_0$ -  
6 dependent signals with predictable spatiotemporal characteristics (each described in turn below)  
7 associated with deep breaths that are visually evident when these scans are viewed as “gray  
8 plots” (Power, 2017) paired with head motion and respiration belt traces. Respiration (measured  
9 using an abdominal belt sampling at 50 Hz;  $z = z$ -score) and head motion (frame-wise  
10 displacement; filtered realignment parameters and calculated over two TRs instead of one; as  
11 done in (Power, 2019)) are shown at the top of Fig. S1 as a blue and red traces, respectively. The  
12 time-courses of all points in the brain before and after each denoising step are shown below these  
13 traces as gray plots (Power, 2017), with white and black representing high and low signal values,  
14 respectively. Four isolated deep breaths, each accompanied by a transient spike in head motion  
15 and followed by pauses in ventilation, are visually apparent in an otherwise eupneic trace. For  
16 each of these respiratory events, there is an increase in head motion, which manifests visually in  
17 the gray plot as a vertical “salt-and-pepper” band time-locked to the deep breath. Because head  
18 movement primarily influences  $S_0$  and not  $T_2^*$ , these signals are discarded by ME-ICA (second  
19 gray plot; red box), as expected. Deep breaths also alter the concentration of carbon dioxide in  
20 blood, however, which in turn influences cerebral blood flow (Hall and Guyton, 2011), and  
21 therefore  $T_2^*$  and not  $S_0$ . Vertical black bands (represented most strongly in gray matter) lasting  
22 tens of seconds after each deep breath, consistent with the expected cortex-wide decrease in  
23 blood flow after a transient increase in ventilation, are retained by ME-ICA (third gray plot; blue  
24 box). While this observation indicates the desired retention of  $T_2^*$ -dependent signals, it also  
25 highlights a limitation that is inherent to ME-ICA. Specifically, that although cortex-wide  
26 fluctuations in signal due to changes in respiration are not a signal of interest per se, they are  
27 retained in the ME-ICA denoised time-series nonetheless because they are  $T_2^*$ -dependent (in  
28 addition, ICA techniques cannot easily separate spatially diffuse signals from focal signals; see  
29 (Power et al., 2019; Power et al., 2018)). Thus, additional denoising procedures (e.g., mean grey  
30 matter time-series regression; MGTR) are required to remove them. ME-ICA paired with MGTR  
31 yields an fMRI time-series free of the confounding influence of head motion (as well as other  $S_0$ -  
32 dependent artifacts) and respiration (fifth gray plot). These gray plots indicate appropriate  
33 separation of  $S_0$ - and  $T_2^*$ -dependent signals of interest using ME-ICA and MGTR. To better  
34 understand the spatiotemporal profile of the signals that were discarded and retained by ME-ICA,  
35 we extracted the average 40 second (-10 seconds to 30 seconds) epoch surrounding deep

36 breaths. These data are displayed on the subject's inflated cortical surface at the bottom of Fig.  
37 S1. The motion-related artifact at  $t=0$  (this is the  $S_0$ -dependent "salt-and-pepper" band bounded  
38 by the red box in the OC-ME – ME-ICA gray plot; red box) is present in the OC-ME time-series  
39 but not the ME-ICA denoised time-series. The spatially diffuse decrease in signal begins  
40 approximately 14 seconds after the deep breath cue (this is the  $T_2^*$ -dependent vertical black band  
41 bounded by the blue box in the ME-ICA gray plot), and is retained in the ME-ICA time-series and  
42 only removed by MGTR.

43  
44  
45  
46  
47  
48  
49

**A** Relationship Between Data Quality and FC Reliability

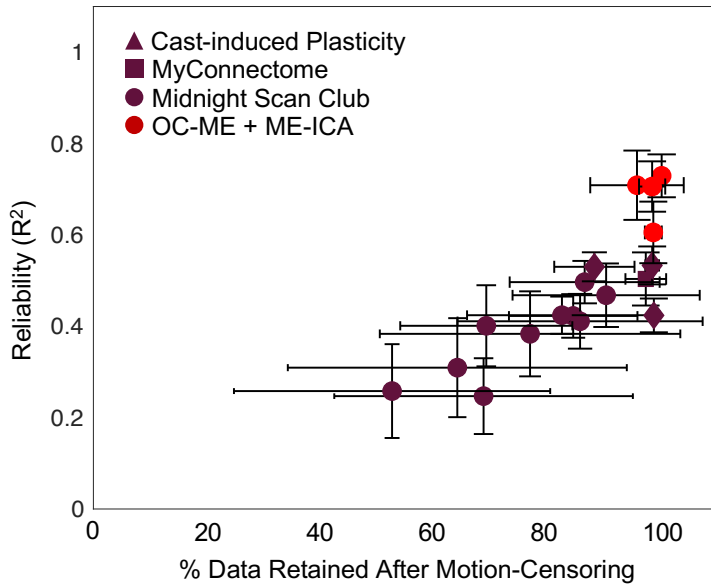

**B** Time x Reliability Curves (ME01 & ME02 vs. 3 Independent SE datasets)

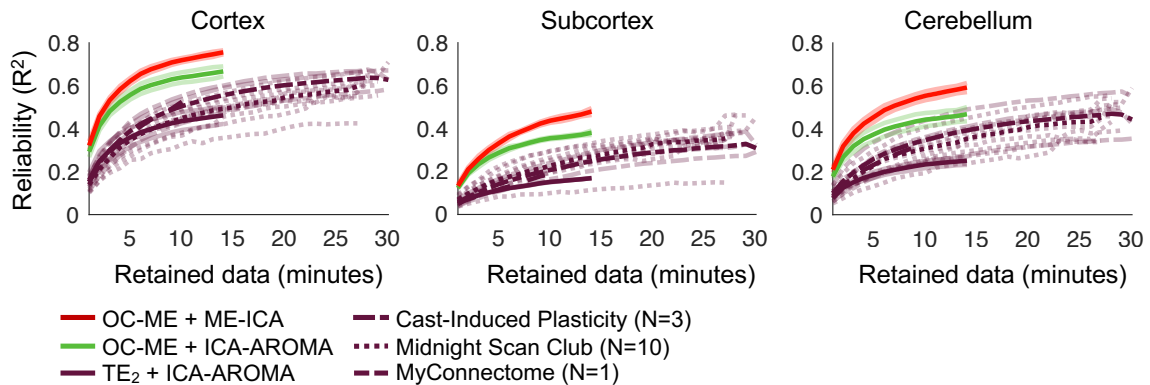

50

51 **Figure S2.** Related to Figure 3. FC reliability values calculated using data from the first ten  
 52 minutes of scanning (the minimum scan duration across all four datasets) plotted relative to the  
 53 percentage of data retained after motion-censoring in Fig. S2A. Error bars indicate standard  
 54 deviation. A subset of MSC participants (purple circles) exhibiting high levels of head movement  
 55 (and less data retained after motion-censoring) exhibited the worst FC reliability. OC-ME + ME-  
 56 ICA data (the red circles in Fig. S2A) yielded better FC reliability values than MyConnectome and  
 57 CAST single-echo data with an equivalent level of motion-censoring. An alternative set of time x  
 58 reliability curves (where the x-axis represents the amount data retained after motion-censoring  
 59 and not the scan duration prior to motion-censoring) is presented in Fig. S2B . This analysis  
 60 yielded a very similar set of curves as in Fig. 3B (with the exception of participants exhibiting

61 especially high levels of head motion; e.g., sub-MSC08). Collectively, these two analyses indicate  
62 that the enhanced reliability of FC measurements in the N=4 multi-echo dataset cannot be  
63 explained by head movement levels.

64  
65  
66  
67  
68  
69  
70  
71  
72  
73  
74  
75  
76  
77  
78  
79  
80  
81  
82  
83  
84  
85  
86  
87  
88

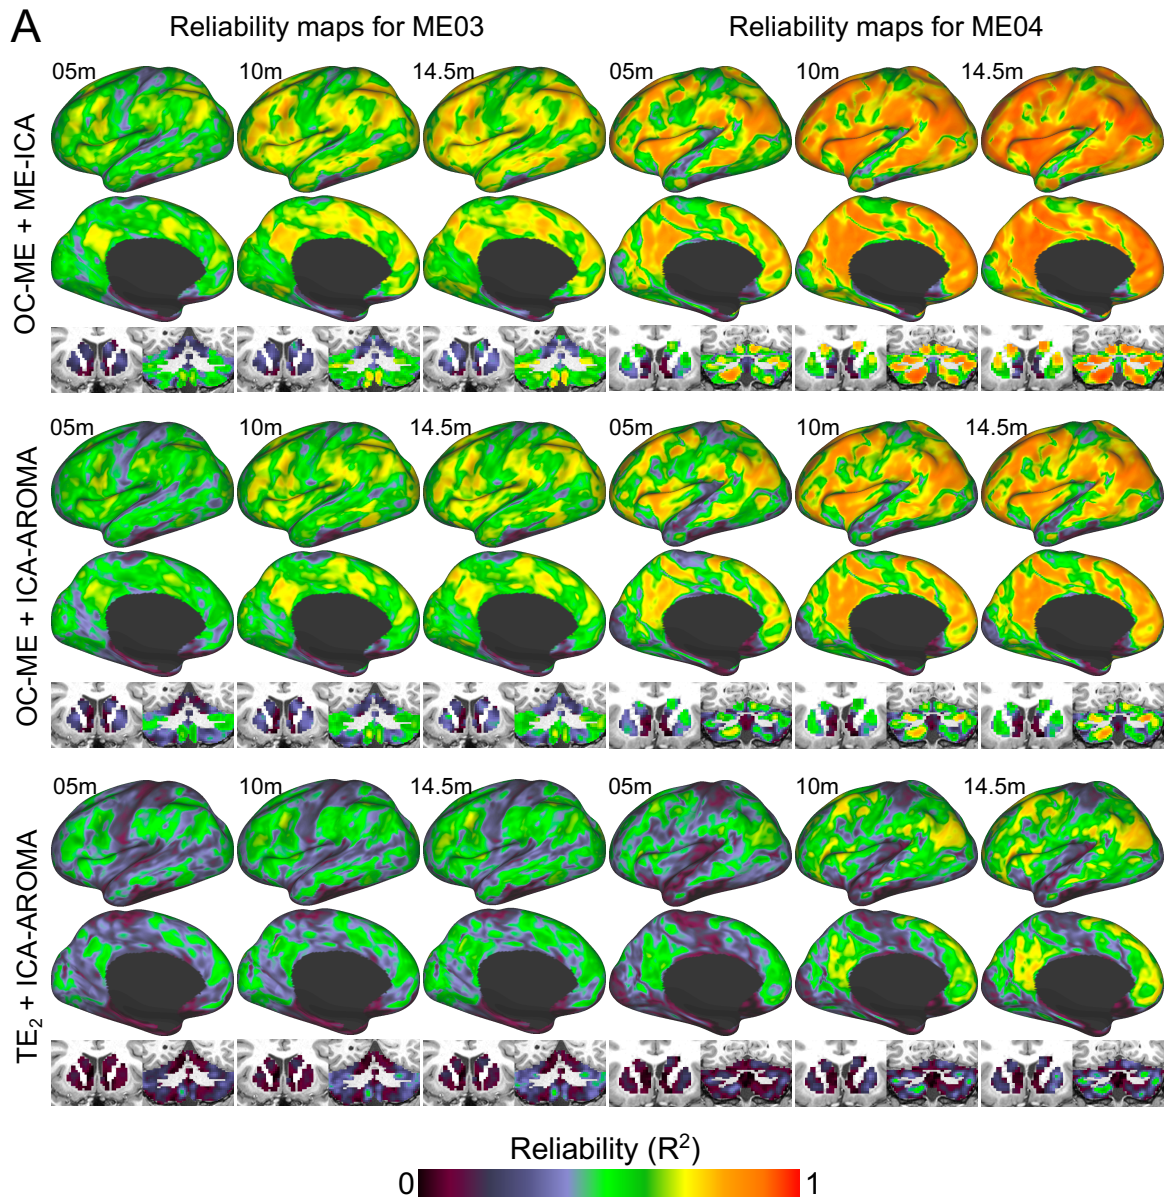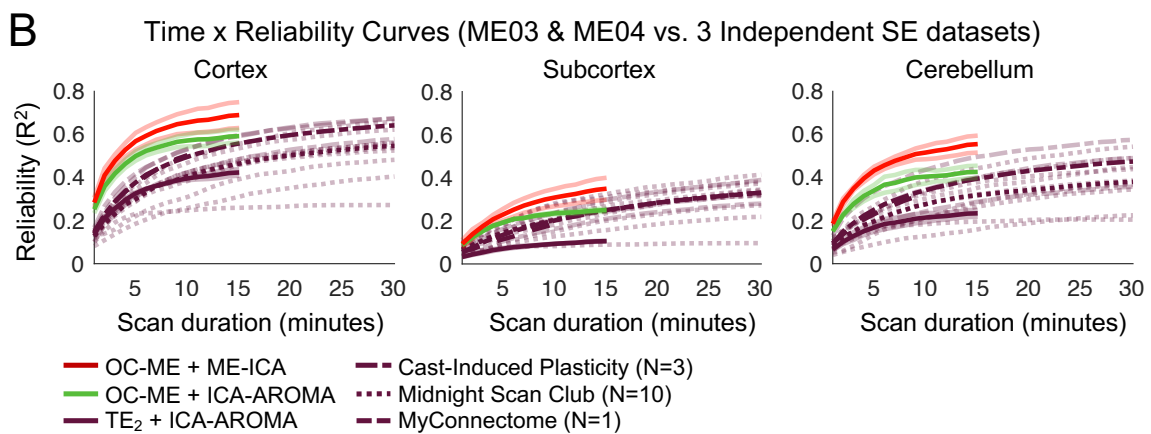

90 **Figure S3.** Related to Figure 3. Reliability of functional connectivity estimates in sub-ME03 and  
91 sub-ME04. The purpose of this analysis was to test whether the enhanced FC reliability observed  
92 in sub-ME01 and sub-ME02 could be replicated in other individuals. Each participant underwent  
93 3 hours of scanning using a multi-echo fMRI sequence (12 x 14.5 minute scans) over a period of  
94 six months. Reliability maps were calculated using the three different denoising strategies,  
95 leveraging both (OC-ME + ME-ICA), one (OC-ME + ICA-AROMA), or no (TE<sub>2</sub> + ICA-AROMA)  
96 advantages of a multi-echo fMRI sequence. Time x reliability curves (Fig. S3B) show the average  
97 reliability value obtained in cortex, subcortical structures (accumbens, amygdala, caudate,  
98 hippocampus, pallidum, putamen, and thalamus), and cerebellum given different scan durations.  
99 Curves from the three independent single-echo datasets were again provided as comparators).  
100 This analysis yielded results consistent with those observed in sub-ME01 and sub-ME02 – the  
101 OC-ME and ME-ICA procedures enhanced the reliability of FC. When using the full scan duration,  
102 32% and 72% of cortex exhibited reliable (> 0.7) FC in sub-ME03 and sub-ME04, respectively.  
103 One sample t-tests revealed that 10 minutes of OC-ME + ME-ICA data yielded FC estimates that  
104 were more reliable than those derived from 3x as much single-echo Midnight Scan Club and Cast-  
105 induced Plasticity data in cortex [  $t(12) = 3.49, p=0.004, \text{Cohen's } d = 0.97$  ] and cerebellum [  $t(12)$   
106  $= 3.67, p=0.003, \text{Cohen's } d = 1.03$  ]. In subcortex, 10 minutes of OC-ME + ME-ICA data yielded  
107 rsFC estimates more reliable than those derived from an equivalent amount of single-echo data [  $t(12)$   
108  $= 6.20, p<0.001, \text{Cohen's } d = 0.81$  ]. These findings are consistent with those from our  
109 analysis of sub-ME01 and sub-ME02 (Fig. 3).

110  
111  
112  
113  
114  
115  
116  
117  
118  
119  
120  
121  
122  
123

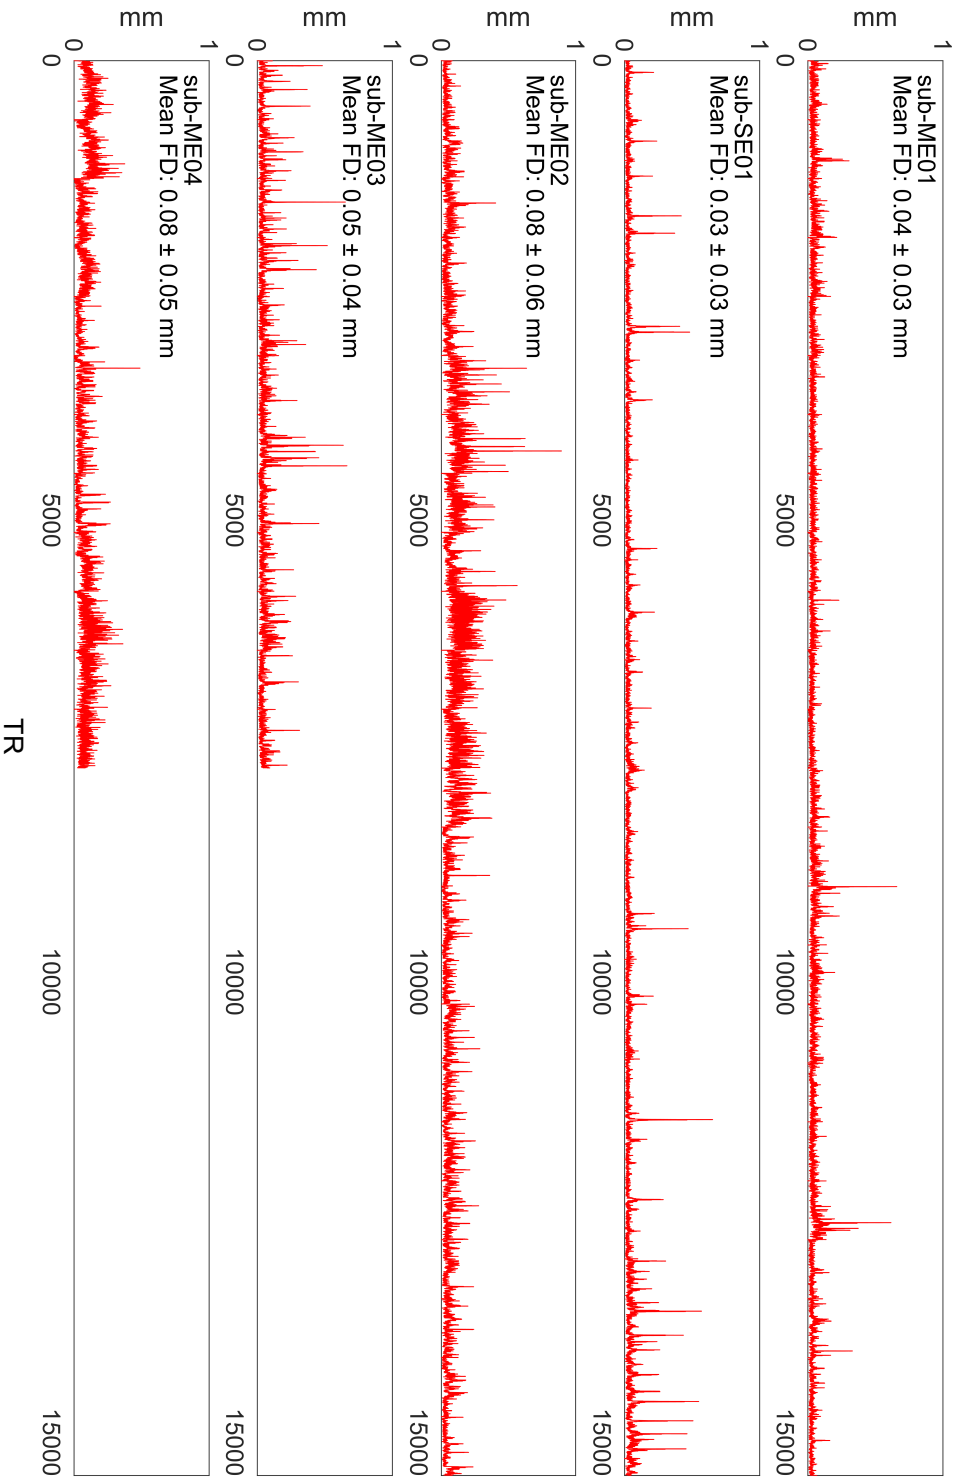

124  
125

126  
127



128 **Figure S4.** Related to Figure 3. Head movement for all four study participants summarized  
129 using concatenated frame-wise displacement (FD) traces. Multiple formulations of FD are  
130 shown to convey the effect of the stopband filter (“Filtered FD 1-TR” vs. “Not Filtered FD-1TR”)  
131 and over 2-TRs (“Filtered FD 2-TRs” versus “Filtered FD 1-TR”). Note that sub-SE01 is  
132 participant sub-ME01, but scanned using a separate fast-TR single-echo sequence.  
133

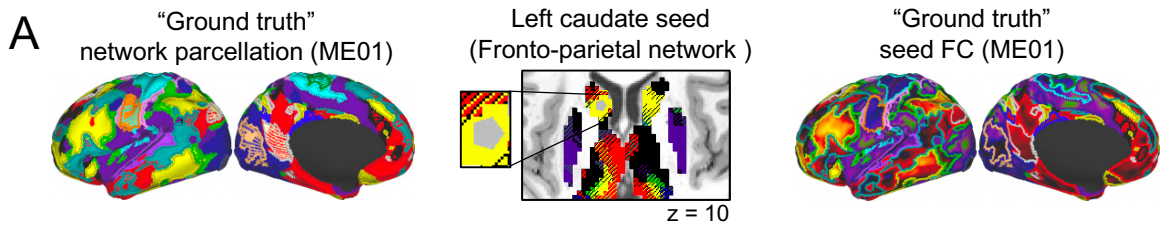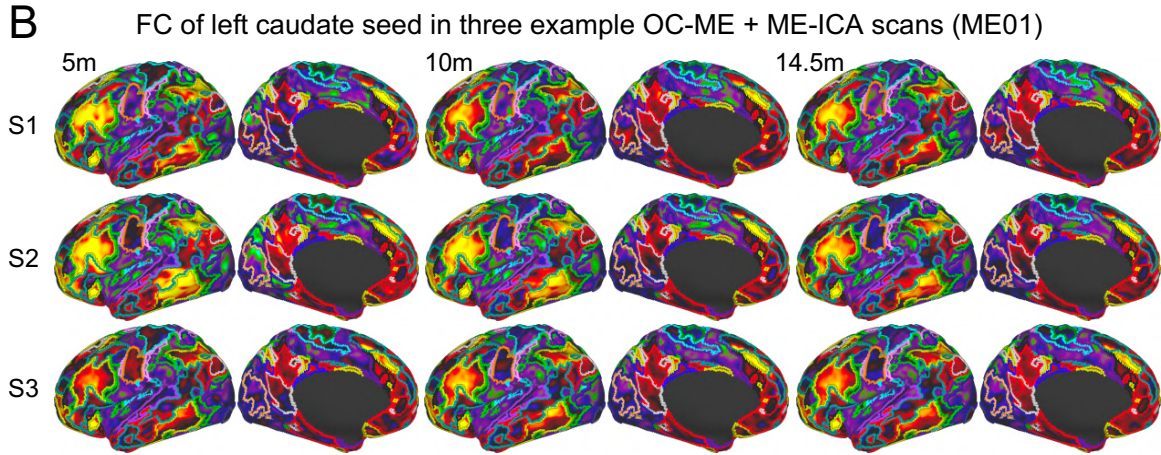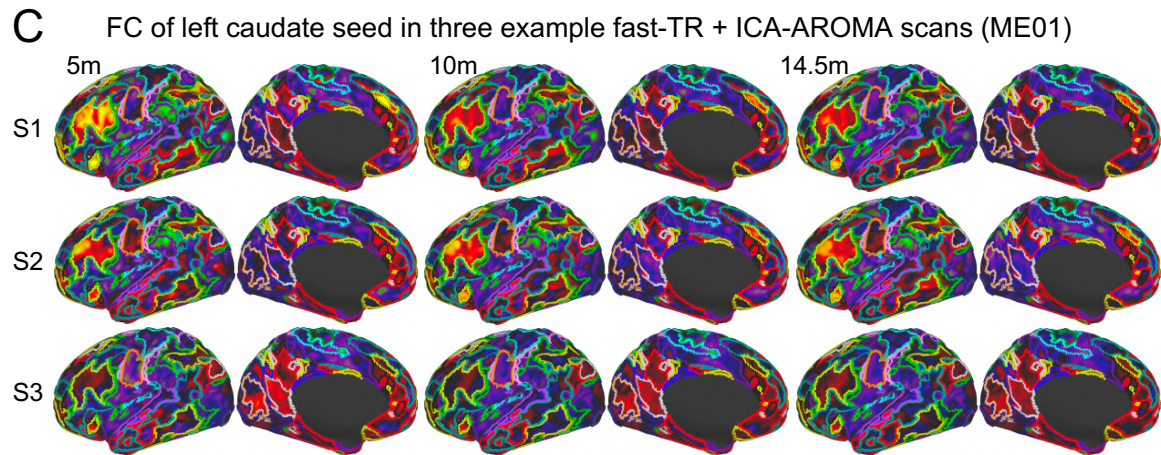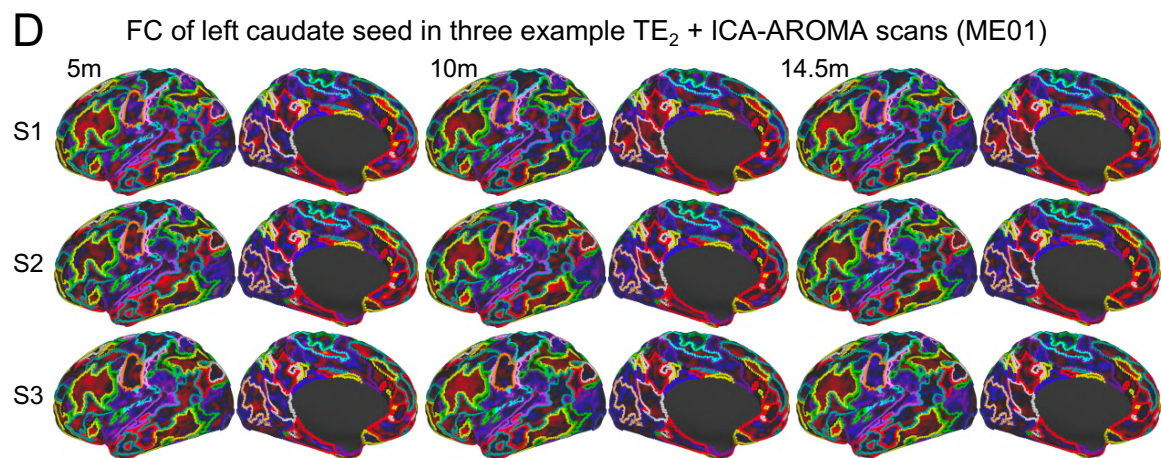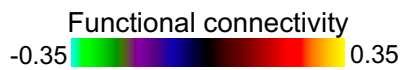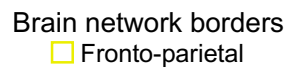

135 **Figures S5.** Related to Figure 4. FC of seed region in left caudate in participant ME01 when using  
136 different amounts of multi-echo (OC-ME + ME-ICA) and single-echo data ( $TE_2$  + ICA-AROMA,  
137 Fast-TR SE + ICA-AROMA) from 3 example scans. S = scan.  
138



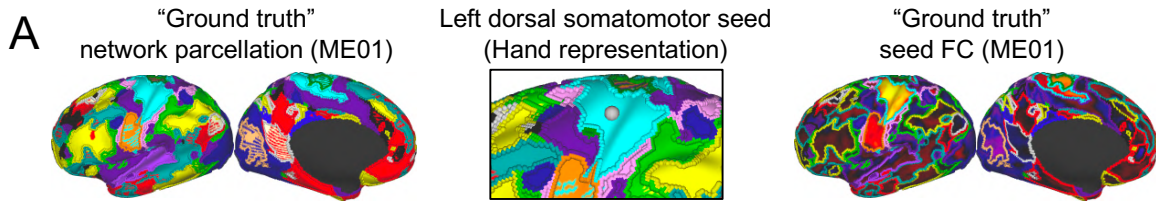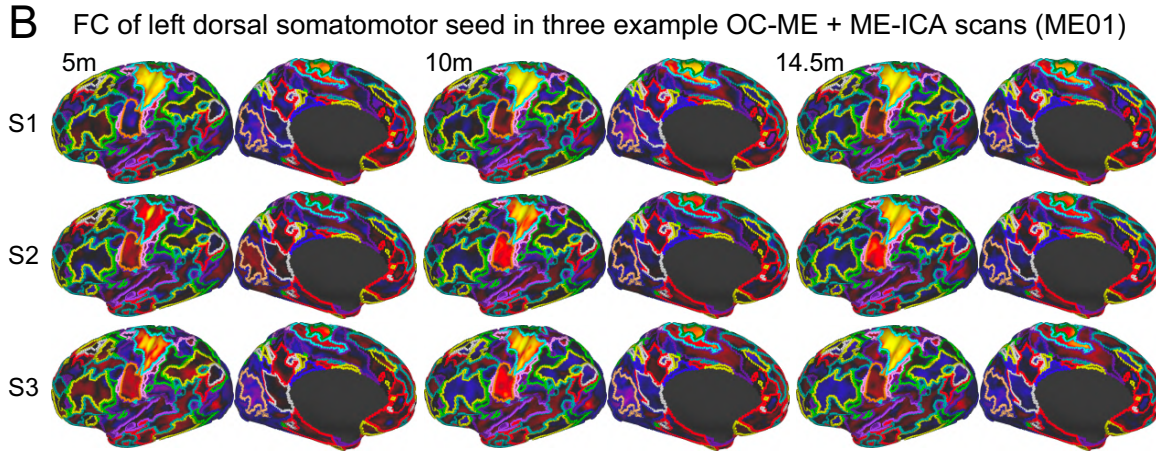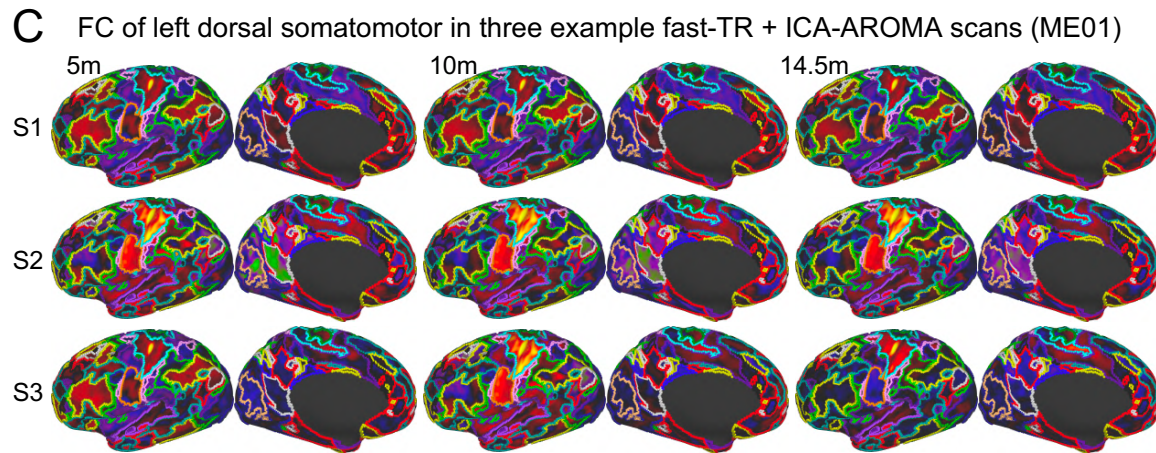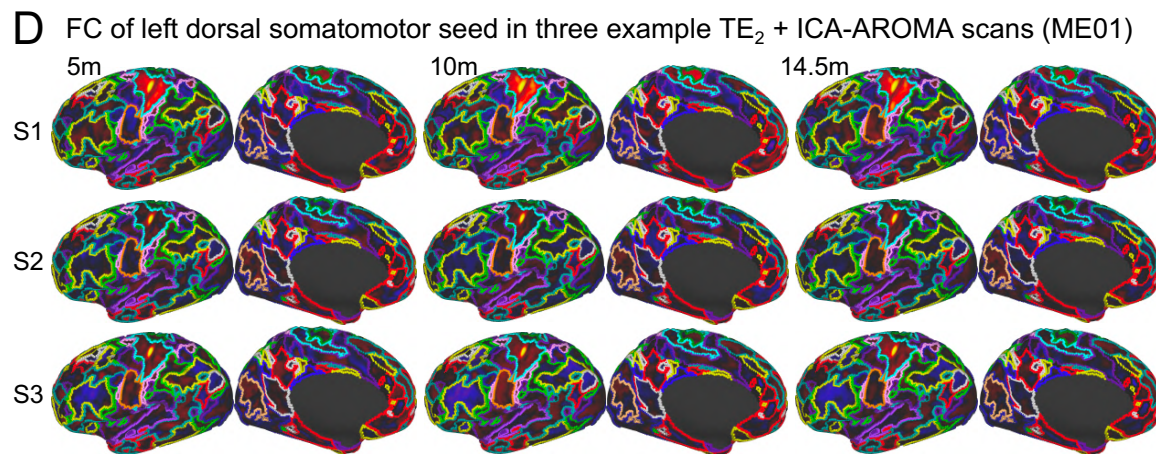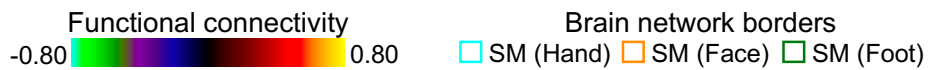

140 **Figures S6.** Related to Figure 4. FC of seed region in left dorsal somatomotor cortex in participant  
141 ME01 when using different amounts of multi-echo (OC-ME + ME-ICA) and single-echo data (TE<sub>2</sub>  
142 + ICA-AROMA, Fast-TR SE + ICA-AROMA) from 3 example scans. S = scan.  
143



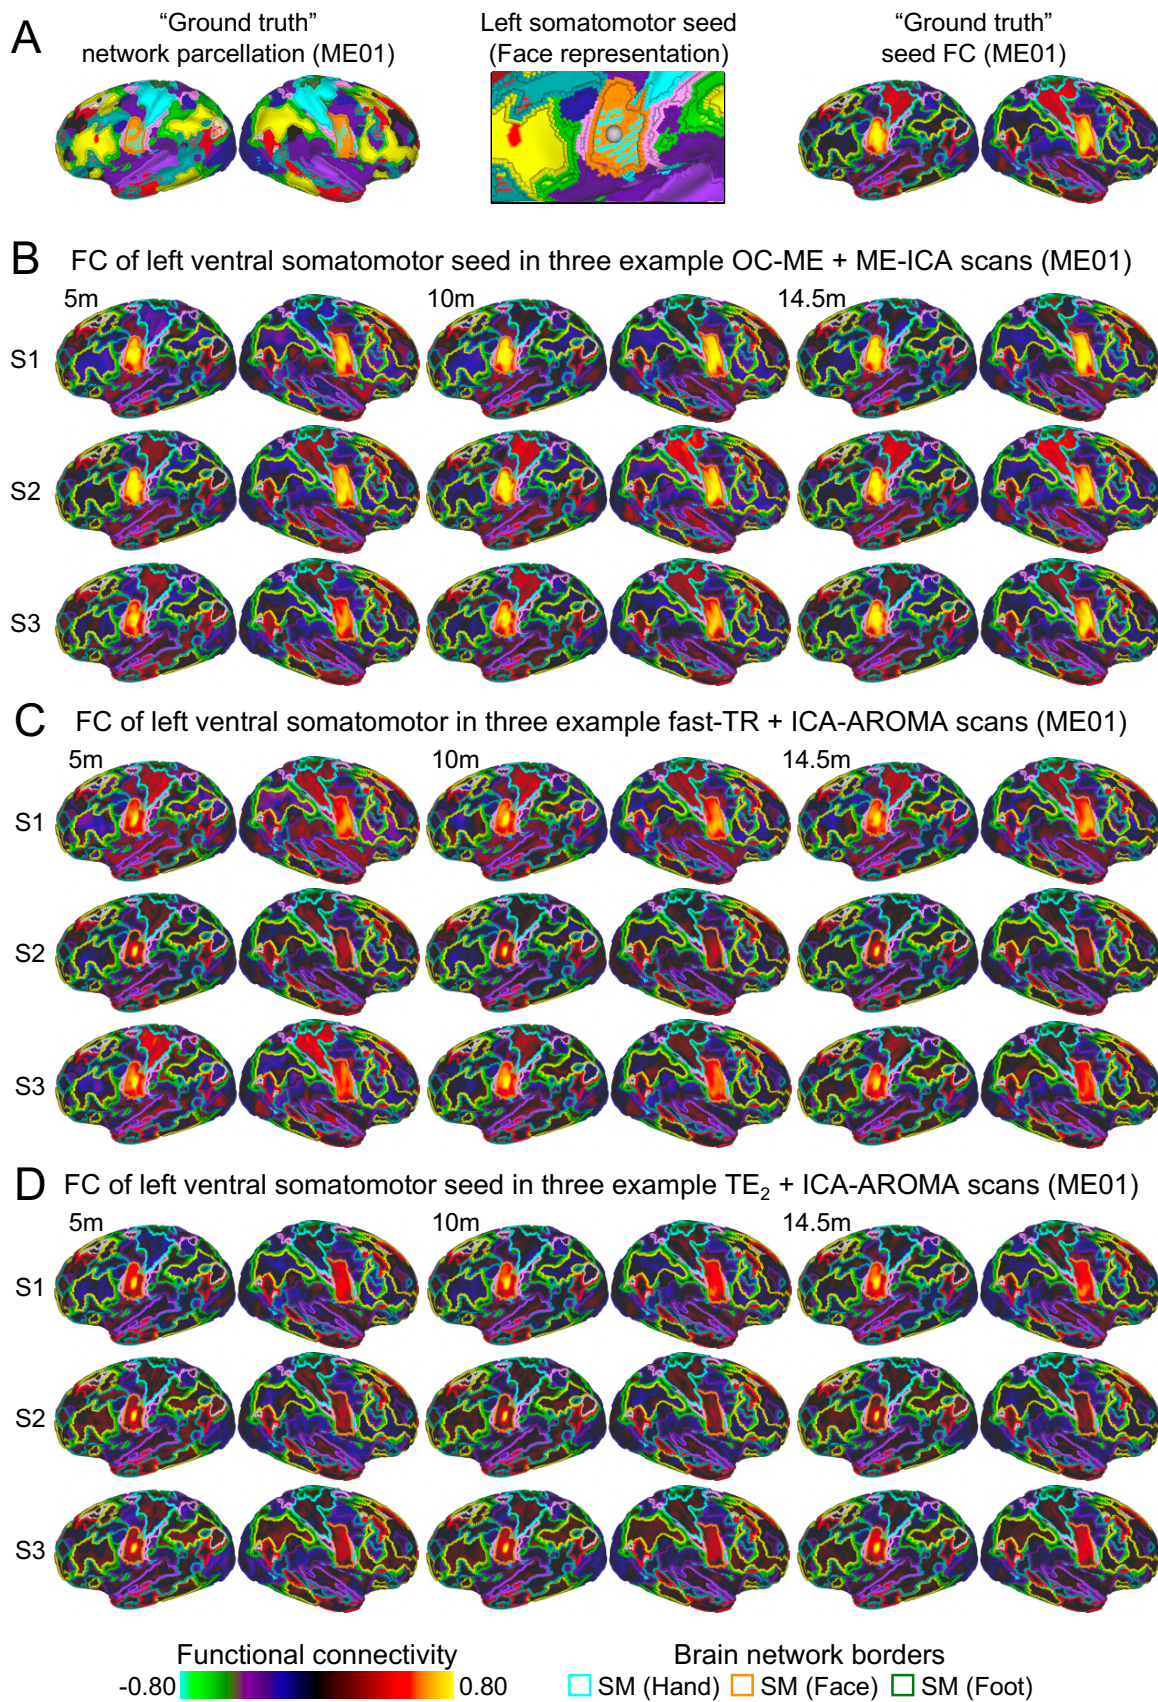

145 **Figures S7.** Related to Figure 4. FC of seed region in ventral somatomotor cortex in participant  
146 ME01 when using different amounts of multi-echo (OC-ME + ME-ICA) and single-echo data (TE<sub>2</sub>  
147 + ICA-AROMA, Fast-TR SE + ICA-AROMA) from 3 example scans. S = scan.  
148



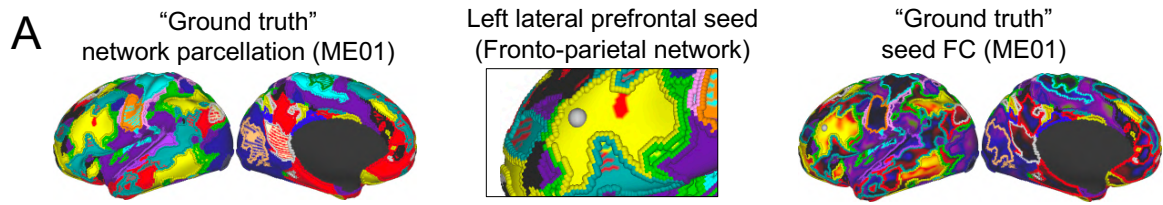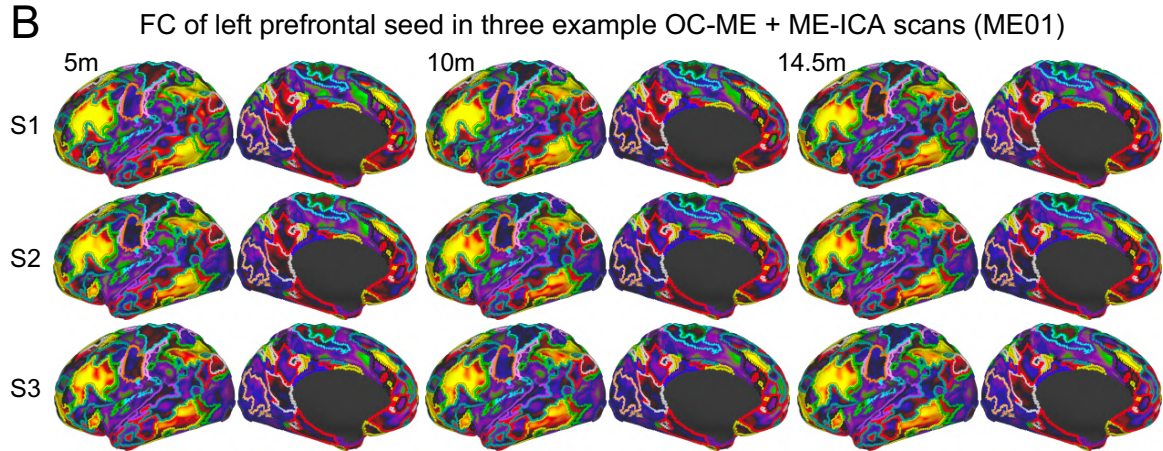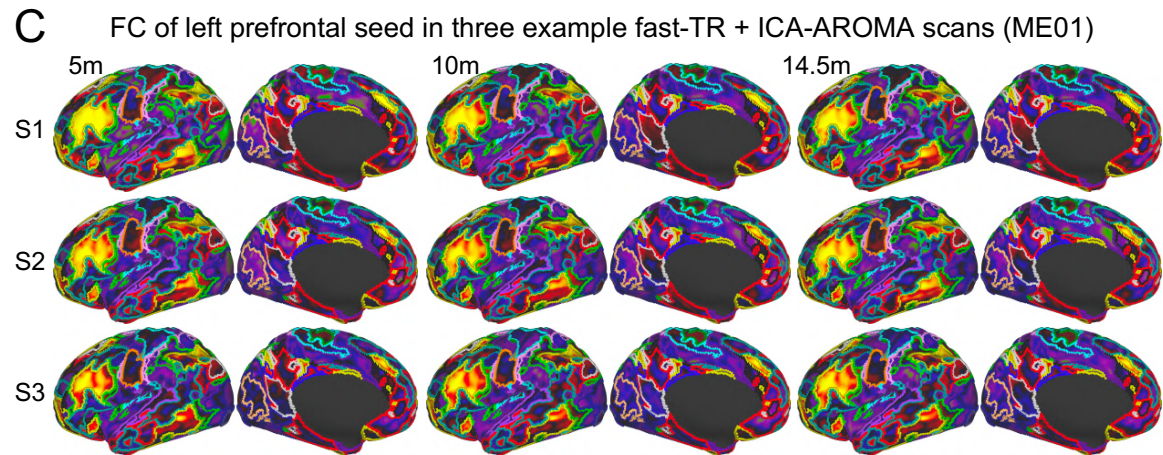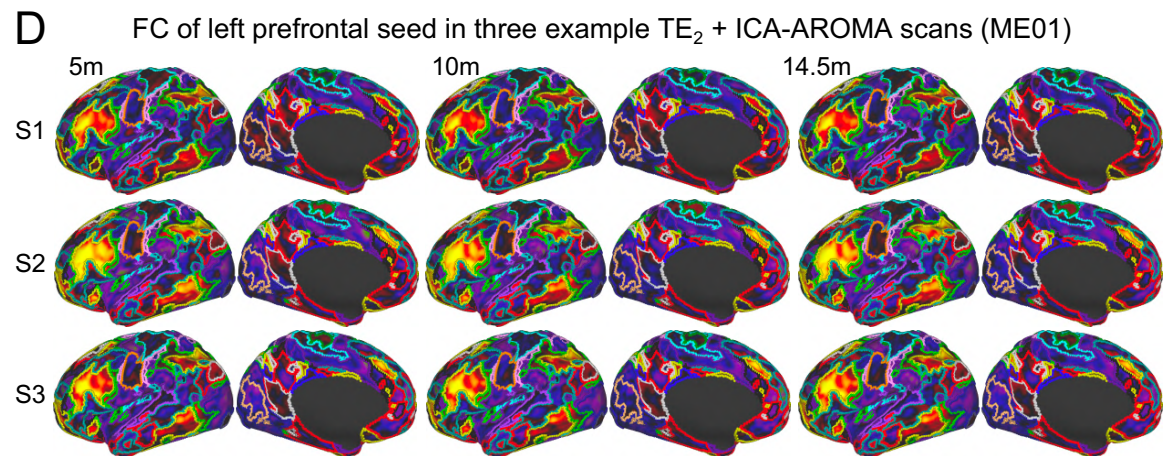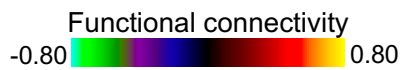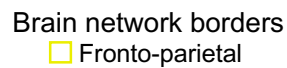

150 **Figures S8.** Related to Figure 4. FC of seed region in lateral prefrontal cortex in participant ME01  
151 when using different amounts of multi-echo (OC-ME + ME-ICA) and single-echo data (TE<sub>2</sub> + ICA-  
152 AROMA, Fast-TR SE + ICA-AROMA) from 3 example scans. S = scan.

153  
154  
155  
156  
157  
158  
159  
160  
161  
162  
163  
164  
165  
166  
167  
168  
169  
170  
171  
172  
173  
174  
175  
176  
177  
178  
179  
180  
181  
182

183 **Table 1.** Related to Star Methods. Summary of the sequence parameters associated with each  
 184 of the datasets used in this investigation.

185

| Dataset                 | Scanner Model              | Spatial Resolution | Repetition Time (TR) | Echo Time (TE)                                                                                                                                     | Multi-band Factor | Number of volumes |
|-------------------------|----------------------------|--------------------|----------------------|----------------------------------------------------------------------------------------------------------------------------------------------------|-------------------|-------------------|
| Midnight Scan Club      | Siemens TRIO 3T            | 4 x 4 x 4 mm       | 2200 ms              | TE <sub>1</sub> : 27 ms                                                                                                                            | None              | 818               |
| Cast-induced Plasticity | Siemens Prisma 3T          | 2.6 x 2.6 x 2.6 mm | 1100 ms              | TE <sub>1</sub> : 33 ms                                                                                                                            | 4                 | 1636              |
| MyConnectome            | Siemens Skyra 3T           | 2.4 x 2.4 x 2.4 mm | 1160 ms              | TE <sub>1</sub> : 30 ms                                                                                                                            | 4                 | 518               |
| Multi-Echo              | Siemens Magnetom Prisma 3T | 2.4 x 2.4 x 2.4 mm | 1355 ms              | TE <sub>1</sub> : 13.40 ms<br>TE <sub>2</sub> : 31.11 ms<br>TE <sub>3</sub> : 48.82 ms<br>TE <sub>4</sub> : 66.53 ms<br>TE <sub>5</sub> : 84.24 ms | 6                 | 640               |
| "Fast-TR" Singe-Echo    | Siemens Magnetom Prisma 3T | 2.4 x 2.4 x 2.4 mm | 800 ms               | TE <sub>1</sub> : 30 ms                                                                                                                            | 6                 | 1084              |

186
